# Supplementary material
Source: PubMed Central journal article supplement (PMC4533992)
Supplement: NIHMS712124-supplement-Leijenaar_Supplement.pdf [file NIHMS712124-supplement-Leijenaar_Supplement.pdf]

Supplementary material for Leijenaar, et al. Stability of FDG-PET Radiomics features: An integrated analysis of test-retest and inter-observer variability. Acta Oncol 2013;52:1391–1397.

## Supplementary Appendix A. Definition of imaging features

### First-order gray-level statistics

Let  $P$  define the first order histogram and  $P(i)$  the fraction of voxels with intensity level  $i$ .  $N_i$  is the number of discrete intensity levels.

- **Energy:** the sum of all voxel SUV values squared.
- **Entropy:**

$$entropy = \sum_{i=1}^{N_i} P(i) \log_2 P(i)$$

- **Kurtosis:** the kurtosis of the first order histogram of voxel intensities.
- **Mean absolute deviation:** the mean of the absolute deviations of all voxel intensities around the mean intensity value.
- **Median:** the median intensity value.
- **Minimum:** the minimum intensity value.
- **Range:** the range of intensity values.
- **Root mean square:** the quadratic mean, or the square root of the mean of squares of all voxel intensities.
- **Skewness:** the skewness of the first order histogram of voxel SUV values.
- **Standard deviation:** the standard deviation of all SUV values.
- **SUV<sub>max</sub>:** the maximum SUV value.
- **SUV<sub>mean</sub>:** the mean SUV value.
- **SUV<sub>peak</sub>:** defined as the mean SUV within a 1 cm<sup>3</sup> sphere centered around the maximum SUV voxel [1].
- **Uniformity:**

$$uniformity = \sum_{i=1}^{N_i} P(i)^2$$

- **Variance:** the variance of all SUV values.

### Geometric features

Geometric features, describing the shape and size of the volume of interest. Let  $V$  be the volume and  $A$  the surface area of the volume of interest.

- **Compactness 1:**

$$compactness\ 1 = \frac{V}{\sqrt{\pi} A^{\frac{2}{3}}}$$

- **Compactness 2:**

$$compactness\ 2 = 36\pi \frac{V^2}{A^3}$$

- **Maximum 3D diameter:** the maximum three-dimensional tumor diameter.

- **Spherical disproportion:**

$$spherical\ disproportion = \frac{A}{4\pi R^2}$$

Where  $R$  is the radius of a sphere with the same volume as the tumor.

- **Sphericity:**

$$sphericity = \frac{\pi^{\frac{1}{3}} (6V)^{\frac{2}{3}}}{A}$$

- **Surface to volume ratio:** the surface area divided by the volume.

### Gray-level co-occurrence matrix-based features

Gray level co-occurrence matrix-based features, as described by Haralick et al. [2]. Let:

$P(i, j)$  be the co-occurrence matrix,

$N_g$  be the number of discrete intensity levels in the image,

$\mu$  be the mean of  $P(i, j)$ ,

$\mu_x(i)$  be the mean of row  $i$ ,

$\mu_y(j)$  be the mean of column  $j$ ,

$\sigma_x(i)$  be the standard deviation of row  $i$ ,

$\sigma_y(j)$  be the standard deviation of column  $j$ ,

$$p_x(i) = \sum_{j=1}^{N_g} P(i, j),$$

$$p_y(j) = \sum_{i=1}^{N_g} P(i, j),$$

$$p_{x+y}(k) = \sum_{i=1}^{N_g} \sum_{j=1}^{N_g} P(i, j), i + j = k,$$

$$k = 2, 3, \dots, 2N_g,$$

$$p_{x-y}(k) = \sum_{i=1}^{N_g} \sum_{j=1}^{N_g} P(i, j), i - j = k, k = 0, 1, \dots, N_g - 1,$$

$$HXY1 = -\sum_{i=1}^{N_g} \sum_{j=1}^{N_g} P(i, j) \log(p_x(i)p_y(j)),$$

$$HXY2 = -\sum_{i=1}^{N_g} \sum_{j=1}^{N_g} p_x(i)p_y(j) \log(p_x(i)p_y(j)).$$

- **Autocorrelation:**

$$autocorrelation = \sum_{i=1}^{N_g} \sum_{j=1}^{N_g} ij p(i, j)$$

- **Cluster prominence:**

$$cluster\ prominence = \sum_{i=1}^{N_g} \sum_{j=1}^{N_g} [i + j - \mu_x(i) - \mu_y(j)]^4 P(i, j)$$

- **Cluster shade:**

$$cluster\ shade = \sum_{i=1}^{N_g} \sum_{j=1}^{N_g} [i + j - \mu_x(i) - \mu_y(j)]^3 P(i, j)$$

- **Cluster tendency:**

$$cluster\ tendency = \sum_{i=1}^{N_g} \sum_{j=1}^{N_g} [i + j - \mu_x(i) - \mu_y(j)]^2 P(i, j)$$

- **Contrast:**

$$contrast = \sum_{i=1}^{N_g} \sum_{j=1}^{N_g} |i - j|^2 P(i, j)$$

- **Correlation:**

$$correlation = \frac{\sum_{i=1}^{N_g} \sum_{j=1}^{N_g} ij P(i, j) - \mu_x(i)\mu_y(j)}{\sigma_x(i)\sigma_y(j)}$$

- **Difference entropy:**

$$difference\ entropy = \sum_{i=0}^{N_g-1} P_{x-y}(i) \log_2 [P_{x-y}(i)]$$

- **Dissimilarity:**

$$dissimilarity = \sum_{i=1}^{N_g} \sum_{j=1}^{N_g} |i - j| P(i, j)$$

- **Energy:**

$$energy = \sum_{i=1}^{N_g} \sum_{j=1}^{N_g} [P(i, j)]^2$$

- **Entropy:**

$$entropy = -\sum_{i=1}^{N_g} \sum_{j=1}^{N_g} P(i, j) \log_2 [P(i, j)]$$

- **Homogeneity 1:**

$$homogeneity\ 1 = \sum_{i=1}^{N_g} \sum_{j=1}^{N_g} \frac{P(i, j)}{1 + |i - j|}$$

- **Homogeneity 2:**

$$homogeneity\ 2 = \sum_{i=1}^{N_g} \sum_{j=1}^{N_g} \frac{P(i, j)}{1 + |i - j|^2}$$

- **Informational measure of correlation 1 (IMC1):**

$$IMC1 = \frac{H - HXY1}{\max\{HX, HY\}}$$

Where  $H$  is the entropy.

- **Informational measure of correlation 2 (IMC2):**

$$IMC2 = \sqrt{1 - e^{-2(HXY2 - H)}}$$

Where  $H$  is the entropy.

- **Inverse Difference Moment Normalized (IDMN):**

$$IDMN = \sum_{i=1}^{N_g} \sum_{j=1}^{N_g} \frac{P(i, j)}{1 + \left(\frac{|i - j|^2}{N^2}\right)}$$

- **Inverse Difference Normalized (IDN):**

$$IDN = \sum_{i=1}^{N_g} \sum_{j=1}^{N_g} \frac{P(i, j)}{1 + \left(\frac{|i - j|}{N}\right)}$$

- **Inverse variance:**

$$inverse\ variance = \sum_{i=1}^{N_g} \sum_{j=1}^{N_g} \frac{P(i, j)}{|i - j|^2}, i \neq j$$

- **Maximum probability:**

$$maximum\ probability = \max\{P(i, j)\}$$

- **Sum average:**

$$sum\ average = \sum_{i=2}^{2N_g} [i P_{x+y}(i)]$$

- **Sum entropy:**

$$\text{sum entropy} = -\sum_{i=2}^{2N_g} P_{x+y}(i) \log_2 [P_{x+y}(i)]$$

- **Sum variance:**

$$\text{sum variance} = \sum_{i=2}^{2N_g} (i - SE)^2 P_{x+y}(i)$$

- **Variance:**

$$\text{variance} = \sum_{i=1}^{N_g} \sum_{j=1}^{N_g} (i - \mu)^2 P(i, j)$$

*Gray-level run-length matrix-based features*

Gray-level run-length matrix-based features, as described by Galloway et al. [3]. Let:

$p(i, j | \theta)$  be the  $(i, j)$  th entry in the given run-length matrix  $p$  for a direction  $\theta$ ,

$N_g$  the number of discrete intensity values in the image,

$N_r$  the number of different run lengths,

$N_p$  the number of voxels in the image.

- **Short Run Emphasis (SRE):**

$$\text{SRE} = \frac{\sum_{i=1}^{N_g} \sum_{j=1}^{N_r} \left[ \frac{p(i, j | \theta)}{j^2} \right]}{\sum_{i=1}^{N_g} \sum_{j=1}^{N_r} p(i, j | \theta)}$$

- **Long Run Emphasis (LRE):**

$$\text{LRE} = \frac{\sum_{i=1}^{N_g} \sum_{j=1}^{N_r} j^2 p(i, j | \theta)}{\sum_{i=1}^{N_g} \sum_{j=1}^{N_r} p(i, j | \theta)}$$

- **Gray Leven Non-Uniformity (GLN):**

$$\text{GLN} = \frac{\sum_{i=1}^{N_g} \left[ \sum_{j=1}^{N_r} p(i, j | \theta) \right]^2}{\sum_{i=1}^{N_g} \sum_{j=1}^{N_r} p(i, j | \theta)}$$

- **Run Length Non-Uniformity (RLN):**

$$\text{RLN} = \frac{\sum_{j=1}^{N_r} \left[ \sum_{i=1}^{N_g} p(i, j | \theta) \right]^2}{\sum_{i=1}^{N_g} \sum_{j=1}^{N_r} p(i, j | \theta)}$$

- **Run Percentage (RP):**

$$\text{RP} = \sum_{i=1}^{N_g} \sum_{j=1}^{N_r} \frac{p(i, j | \theta)}{N_p}$$

- **Low Gray Level Run Emphasis (LGLRE):**

$$\text{LGLRE} = \frac{\sum_{i=1}^{N_g} \sum_{j=1}^{N_r} \left[ \frac{p(i, j | \theta)}{j^2} \right]}{\sum_{i=1}^{N_g} \sum_{j=1}^{N_r} p(i, j | \theta)}$$

- **High Gray Level Run Emphasis (HGLRE):**

$$\text{HGLRE} = \frac{\sum_{i=1}^{N_g} \sum_{j=1}^{N_r} i^2 p(i, j | \theta)}{\sum_{i=1}^{N_g} \sum_{j=1}^{N_r} p(i, j | \theta)}$$

- **Short Run Low Gray Level Emphasis (SRLGLE):**

$$\text{SRLGLE} = \frac{\sum_{i=1}^{N_g} \sum_{j=1}^{N_r} \left[ \frac{p(i, j | \theta)}{i^2 j^2} \right]}{\sum_{i=1}^{N_g} \sum_{j=1}^{N_r} p(i, j | \theta)}$$

- **Short Run High Gray Level Emphasis (SRHGLE):**

$$\text{SRHGLE} = \frac{\sum_{i=1}^{N_g} \sum_{j=1}^{N_r} \left[ \frac{p(i, j | \theta) i^2}{j^2} \right]}{\sum_{i=1}^{N_g} \sum_{j=1}^{N_r} p(i, j | \theta)}$$

- **Long Run Low Gray Level Emphasis (LRLGLE):**

$$\text{LRLGLE} = \frac{\sum_{i=1}^{N_g} \sum_{j=1}^{N_r} \left[ \frac{p(i, j | \theta) j^2}{i^2} \right]}{\sum_{i=1}^{N_g} \sum_{j=1}^{N_r} p(i, j | \theta)}$$

- **Long Run High Gray Level Emphasis (LRHGLE):**

$$\text{LRHGLE} = \frac{\sum_{i=1}^{N_g} \sum_{j=1}^{N_r} p(i, j | \theta) i^2 j^2}{\sum_{i=1}^{N_g} \sum_{j=1}^{N_r} p(i, j | \theta)}$$

*Gray-level size-zone matrix-based features*

Gray-level size-zone matrix-based features, as described by Tixier et al. [4]. Let:

$p(i, j)$  be the  $(i, j)$  th entry in the given size-zone matrix  $p$ ,

$N_g$  the number of discrete intensity values in the image,

$N_z$  the size of the largest, homogeneous region in the volume of interest,

$N_a$  the number homogeneous areas in the image.

- **Small area Emphasis (SAE):**

$$SAE = \frac{\sum_{i=1}^{N_g} \sum_{j=1}^{N_z} \left[ \frac{p(i,j)}{j^2} \right]}{\sum_{i=1}^{N_g} \sum_{j=1}^{N_z} p(i,j)}$$

- **Large area Emphasis (LAE):**

$$LAE = \frac{\sum_{i=1}^{N_g} \sum_{j=1}^{N_z} j^2 p(i,j)}{\sum_{i=1}^{N_g} \sum_{j=1}^{N_z} p(i,j)}$$

- **Intensity variability (IV):**

$$IV = \frac{\sum_{i=1}^{N_g} \left[ \sum_{j=1}^{N_z} p(i,j) \right]^2}{\sum_{i=1}^{N_g} \sum_{j=1}^{N_z} p(i,j)}$$

- **Size-zone variability (SZV):**

$$SZV = \frac{\sum_{i=1}^{N_g} \left[ \sum_{j=1}^{N_z} p(i,j) \right]^2}{\sum_{i=1}^{N_g} \sum_{j=1}^{N_z} p(i,j)}$$

- **Zone Percentage (ZP):**

$$ZP = \sum_{i=1}^{N_g} \sum_{j=1}^{N_z} \frac{p(i,j)}{N_a}$$

- **Low intensity Emphasis (LIE):**

$$LIE = \frac{\sum_{i=1}^{N_g} \sum_{j=1}^{N_z} \left[ \frac{p(i,j)}{i^2} \right]}{\sum_{i=1}^{N_g} \sum_{j=1}^{N_z} p(i,j)}$$

- **High intensity Emphasis (HIE):**

$$HIE = \frac{\sum_{i=1}^{N_g} \sum_{j=1}^{N_z} i^2 p(i,j)}{\sum_{i=1}^{N_g} \sum_{j=1}^{N_z} p(i,j)}$$

- **Low intensity small area Emphasis (LISAE):**

$$LISAE = \frac{\sum_{i=1}^{N_g} \sum_{j=1}^{N_z} \left[ \frac{p(i,j)}{i^2 j^2} \right]}{\sum_{i=1}^{N_g} \sum_{j=1}^{N_z} p(i,j)}$$

- **High intensity small area Emphasis (HISAE):**

$$HISAE = \frac{\sum_{i=1}^{N_g} \sum_{j=1}^{N_z} \left[ \frac{p(i,j) i^2}{j^2} \right]}{\sum_{i=1}^{N_g} \sum_{j=1}^{N_z} p(i,j)}$$

- **Low intensity large area Emphasis (LILAE):**

$$LILAE = \frac{\sum_{i=1}^{N_g} \sum_{j=1}^{N_z} \left[ \frac{p(i,j) j^2}{i^2} \right]}{\sum_{i=1}^{N_g} \sum_{j=1}^{N_z} p(i,j)}$$

- **High intensity large area Emphasis (HILAE):**

$$HILAE = \frac{\sum_{i=1}^{N_g} \sum_{j=1}^{N_z} p(i,j) i^2 j^2}{\sum_{i=1}^{N_g} \sum_{j=1}^{N_z} p(i,j)}$$

## Supplementary Appendix B. Tables

Table BI. Results for the test-retest analysis, showing ICC,  $COV_{\%mean}$  and  $COV_{\%range}$  ranges, as well as the number of features per feature group and per class, defined as high ( $ICC \geq 0.8$ ), medium ( $0.8 > ICC \geq 0.5$ ), or low ( $ICC < 0.5$ ) stability. Median values of ICC,  $COV_{\%mean}$  and  $COV_{\%range}$  ranges are shown within brackets.

| Stability class        | N  | ICC              | $COV_{\%mean}$ (%)   | $COV_{\%range}$ (%) |
|------------------------|----|------------------|----------------------|---------------------|
| First order statistics |    |                  |                      |                     |
| High stability         | 13 | 0.81–0.96 (0.92) | 17.27–86.29 (23.45)  | 12.22–35.36 (14.67) |
| Medium stability       | 0  | –                | –                    | –                   |
| Low stability          | 2  | 0.27–0.28 (0.27) | 57.29–110.48 (83.89) | 55.61–60.58 (58.09) |
| IVH features           |    |                  |                      |                     |
| High stability         | 18 | 0.80–0.94 (0.86) | 17.09–44.07 (29.19)  | 3.39–23.78 (14.82)  |
| Medium stability       | 3  | 0.61–0.78 (0.77) | 37.26–105.65 (50.40) | 6.03–28.04 (20.33)  |
| Low stability          | 8  | 0.00–0.48 (0.27) | 7.68–99.25 (46.30)   | 46.82–68.00 (60.54) |
| Geometric features     |    |                  |                      |                     |
| High stability         | 8  | 0.81–0.88 (0.83) | 12.25–37.61 (29.53)  | 3.80–31.58 (18.79)  |
| Medium stability       | 0  | –                | –                    | –                   |
| Low stability          | 0  | –                | –                    | –                   |
| Textural features      |    |                  |                      |                     |
| High stability         | 29 | 0.81–0.93 (0.89) | 2.76–166.45 (36.90)  | 5.94–36.42 (19.25)  |
| Medium stability       | 14 | 0.54–0.79 (0.64) | 3.57–465.37 (75.93)  | 4.32–54.56 (33.96)  |
| Low stability          | 1  | 0.35             | 84.19                | 53.59               |

Table BII. Results for the inter-observer analysis, showing ICC,  $COV_{\%mean}$  and  $COV_{\%range}$  ranges, as well as the number of features per feature group and per class, defined as high ( $ICC \geq 0.8$ ), medium ( $0.8 > ICC \geq 0.5$ ), or low ( $ICC < 0.5$ ) stability. Median values of ICC,  $COV_{\%mean}$  and  $COV_{\%range}$  ranges are shown within brackets.

| Stability class        | N  | ICC              | $COV_{\%mean}$ (%)     | $COV_{\%range}$ (%) |
|------------------------|----|------------------|------------------------|---------------------|
| First order statistics |    |                  |                        |                     |
| High stability         | 14 | 0.87–1.00 (0.98) | 2.07–58.17 (15.25)     | 1.20–22.75 (7.39)   |
| Medium stability       | 1  | 0.79             | 65.81                  | 41.21               |
| Low stability          | 0  | –                | –                      | –                   |
| IVH features           |    |                  |                        |                     |
| High stability         | 34 | 0.82–1.00 (0.97) | 5.60–131.45 (28.57)    | 1.23–52.15 (10.70)  |
| Medium stability       | 5  | 0.63–0.77 (0.72) | 4.53–39.04 (21.74)     | 38.72–57.65 (51.14) |
| Low stability          | 0  | –                | –                      | –                   |
| Geometric features     |    |                  |                        |                     |
| High stability         | 8  | 0.80–0.98 (0.97) | 11.63–48.47 (26.79)    | 9.60–31.31 (19.20)  |
| Medium stability       | 0  | –                | –                      | –                   |
| Low stability          | 0  | –                | –                      | –                   |
| Textural features      |    |                  |                        |                     |
| High stability         | 39 | 0.80–0.99 (0.95) | 1.20–257.20 (28.61)    | 5.34–40.03 (13.19)  |
| Medium stability       | 3  | 0.50–0.77 (0.75) | 44.46–128.87 (104.07)  | 12.38–51.25 (30.16) |
| Low stability          | 2  | 0.17–0.19 (0.18) | 156.41–192.86 (174.63) | 57.96–76.36 (67.16) |

Table BIII. ICC,  $COV_{\%mean}$  and  $COV_{\%range}$  values for all first order statistics. ICC values marked with an asterisk (\*) are statistically non-significant ( $p \geq 0.05$ ).

| Feature name       | Test-retest |                    |                     | Inter-observer |                    |                     |
|--------------------|-------------|--------------------|---------------------|----------------|--------------------|---------------------|
|                    | ICC         | $COV_{\%mean}$ (%) | $COV_{\%range}$ (%) | ICC            | $COV_{\%mean}$ (%) | $COV_{\%range}$ (%) |
| Energy             | 0.96        | 86.29              | 13.67               | 0.99           | 16.27              | 1.68                |
| Entropy            | 0.91        | 17.27              | 22.26               | 0.97           | 7.41               | 10.61               |
| Kurtosis           | 0.27*       | 57.29              | 60.58               | 0.91           | 26.25              | 19.97               |
| Mean deviation     | 0.93        | 22.46              | 15.15               | 0.99           | 11.00              | 5.25                |
| Median             | 0.85        | 28.59              | 17.48               | 0.89           | 25.02              | 16.37               |
| Minimum            | 0.81        | 29.07              | 19.08               | 0.79           | 65.81              | 41.21               |
| Range              | 0.92        | 24.04              | 15.96               | 0.99           | 8.22               | 4.76                |
| Root mean square   | 0.90        | 22.27              | 13.99               | 0.97           | 14.22              | 9.53                |
| Skewness           | 0.28*       | 110.48             | 55.61               | 0.87           | 58.17              | 22.75               |
| Standard deviation | 0.93        | 19.99              | 14.17               | 0.99           | 9.84               | 4.84                |
| $SUV_{max}$        | 0.93        | 18.51              | 12.22               | 1.00           | 3.34               | 2.11                |
| $SUV_{mean}$       | 0.87        | 23.45              | 14.67               | 0.95           | 17.95              | 11.85               |
| $SUV_{peak}$       | 0.94        | 21.06              | 12.28               | 1.00           | 2.07               | 1.20                |
| Uniformity         | 0.87        | 60.81              | 35.36               | 0.96           | 32.85              | 17.88               |
| Variance           | 0.93        | 43.29              | 14.48               | 0.99           | 20.14              | 4.64                |

Table BIV. ICC,  $COV_{\%mean}$  and  $COV_{\%range}$  values for all intensity volume histogram features. ICC values marked with an asterisk (\*) are statistically non-significant ( $p \geq 0.05$ ).

| Feature name            | Test-retest |                    |                     | Inter-observer |                    |                     |
|-------------------------|-------------|--------------------|---------------------|----------------|--------------------|---------------------|
|                         | ICC         | $COV_{\%mean}$ (%) | $COV_{\%range}$ (%) | ICC            | $COV_{\%mean}$ (%) | $COV_{\%range}$ (%) |
| AIRV <sub>10%</sub>     | 0.80        | 28.84              | 18.43               | 0.87           | 38.96              | 23.85               |
| AIRV <sub>20%</sub>     | 0.82        | 28.07              | 17.48               | 0.89           | 32.61              | 20.96               |
| AIRV <sub>30%</sub>     | 0.82        | 28.50              | 17.54               | 0.89           | 29.72              | 18.36               |
| AIRV <sub>40%</sub>     | 0.83        | 29.57              | 17.91               | 0.89           | 27.60              | 17.40               |
| AIRV <sub>50%</sub>     | 0.83        | 28.96              | 17.78               | 0.88           | 25.03              | 16.42               |
| AIRV <sub>60%</sub>     | 0.86        | 26.86              | 16.24               | 0.90           | 21.88              | 14.15               |
| AIRV <sub>70%</sub>     | 0.91        | 21.85              | 13.41               | 0.94           | 17.27              | 11.18               |
| AIRV <sub>80%</sub>     | 0.91        | 20.91              | 13.21               | 0.96           | 13.90              | 8.78                |
| AIRV <sub>90%</sub>     | 0.94        | 17.09              | 11.34               | 0.98           | 10.76              | 6.76                |
| AVRI <sub>10%</sub>     | –           | –                  | –                   | 0.98           | 46.68              | 10.66               |
| AVRI <sub>20%</sub>     | –           | –                  | –                   | 0.98           | 35.97              | 7.75                |
| AVRI <sub>30%</sub>     | –           | –                  | –                   | 0.99           | 29.54              | 6.01                |
| AVRI <sub>40%</sub>     | –           | –                  | –                   | 0.99           | 24.17              | 4.84                |
| AVRI <sub>50%</sub>     | –           | –                  | –                   | 0.99           | 18.82              | 3.88                |
| AVRI <sub>60%</sub>     | 0.88        | 31.20              | 3.39                | 0.99           | 10.58              | 2.09                |
| AVRI <sub>70%</sub>     | 0.87        | 41.35              | 4.52                | 1.00           | 5.71               | 1.23                |
| AVRI <sub>80%</sub>     | 0.87        | 44.07              | 5.43                | 1.00           | 5.60               | 1.55                |
| AVRI <sub>90%</sub>     | 0.61        | 105.65             | 20.33               | 0.99           | 7.92               | 2.22                |
| AVRI <sub>90%-10%</sub> | 0.86        | 29.42              | 3.51                | 0.98           | 47.26              | 10.74               |
| AVRI <sub>80%-20%</sub> | 0.85        | 31.71              | 3.84                | 0.98           | 37.91              | 8.07                |
| AVRI <sub>70%-30%</sub> | 0.83        | 36.41              | 4.78                | 0.98           | 34.77              | 7.00                |
| AVRI <sub>60%-40%</sub> | 0.77        | 37.26              | 6.03                | 0.98           | 35.16              | 7.10                |
| AIRV <sub>90%-10%</sub> | 0.94        | 23.18              | 16.32               | 0.98           | 13.02              | 6.29                |
| AIRV <sub>80%-20%</sub> | 0.87        | 30.33              | 19.18               | 0.98           | 15.49              | 7.17                |
| AIRV <sub>70%-30%</sub> | 0.85        | 42.11              | 23.78               | 0.97           | 21.23              | 9.66                |
| AIRV <sub>60%-40%</sub> | 0.78        | 50.40              | 28.04               | 0.90           | 39.13              | 17.91               |
| RVRI <sub>90%-10%</sub> | 0.48        | 7.68               | 46.82               | 0.77           | 5.70               | 52.53               |
| RVRI <sub>80%-20%</sub> | 0.34*       | 16.16              | 62.94               | 0.63           | 21.74              | 51.14               |
| RVRI <sub>70%-30%</sub> | –0.02*      | 37.24              | 68.00               | 0.72           | 30.54              | 38.72               |
| RVRI <sub>60%-40%</sub> | 0.20*       | 51.82              | 54.78               | 0.74           | 39.04              | 38.90               |
| RVRI <sub>10%</sub>     | –           | –                  | –                   | 0.69           | 4.53               | 57.65               |
| RVRI <sub>20%</sub>     | –           | –                  | –                   | 0.82           | 15.92              | 41.26               |
| RVRI <sub>30%</sub>     | –           | –                  | –                   | 0.88           | 21.78              | 24.32               |
| RVRI <sub>40%</sub>     | –           | –                  | –                   | 0.88           | 29.60              | 20.43               |
| RVRI <sub>50%</sub>     | –           | –                  | –                   | 0.90           | 45.24              | 21.49               |
| RVRI <sub>60%</sub>     | 0.10*       | 40.78              | 58.14               | 0.91           | 60.18              | 26.47               |
| RVRI <sub>70%</sub>     | –0.02*      | 62.45              | 68.00               | 0.91           | 76.83              | 34.34               |
| RVRI <sub>80%</sub>     | 0.34*       | 71.38              | 62.94               | 0.93           | 131.45             | 52.15               |
| RVRI <sub>90%</sub>     | 0.48        | 99.25              | 46.82               | 0.97           | 125.12             | 46.72               |

Table BV. ICC,  $COV_{\%mean}$  and  $COV_{\%range}$  values for all geometric features.

| Feature name       | Test-retest |                    |                     | Inter-observer |                    |                     |
|--------------------|-------------|--------------------|---------------------|----------------|--------------------|---------------------|
|                    | ICC         | $COV_{\%mean}$ (%) | $COV_{\%range}$ (%) | ICC            | $COV_{\%mean}$ (%) | $COV_{\%range}$ (%) |
| Compactness 1      | 0.85        | 27.83              | 7.60                | 0.98           | 21.75              | 9.60                |
| Compactness 2      | 0.81        | 35.37              | 31.58               | 0.80           | 32.81              | 28.58               |
| Maximum diameter   | 0.88        | 31.69              | 15.78               | 0.96           | 33.41              | 21.52               |
| Sph. disproportion | 0.81        | 13.74              | 30.93               | 0.80           | 13.04              | 31.31               |
| Sphericity         | 0.81        | 12.25              | 30.44               | 0.80           | 11.63              | 29.38               |
| Surface area       | 0.85        | 37.61              | 7.95                | 0.98           | 31.83              | 9.73                |
| Surface/volume     | 0.83        | 23.35              | 21.80               | 0.97           | 21.52              | 16.88               |
| Volume             | 0.84        | 31.24              | 3.80                | 0.98           | 48.47              | 11.19               |

Sph. Disproportion, Spherical disproportion.

Table BVI. ICC,  $COV_{\%mean}$  and  $COV_{\%range}$  values for all textural features, subdivided into gray-level co-occurrence, gray-level run-length and gray-level size-zone features. ICC values marked with asterix (\*) are statistically non-significant ( $p \geq 0.05$ ).

| Feature name             | Test-retest |                    |                     | Inter-observer |                    |                     |
|--------------------------|-------------|--------------------|---------------------|----------------|--------------------|---------------------|
|                          | ICC         | $COV_{\%mean}$ (%) | $COV_{\%range}$ (%) | ICC            | $COV_{\%mean}$ (%) | $COV_{\%range}$ (%) |
| Gray level co-occurrence |             |                    |                     |                |                    |                     |
| Autocorrelation          | 0.91        | 42.46              | 12.86               | 0.96           | 31.11              | 10.19               |
| Cluster prominence       | 0.93        | 166.45             | 25.08               | 0.99           | 80.99              | 9.70                |
| Cluster shade            | 0.64        | 395.05             | 44.09               | 0.88           | 137.31             | 19.20               |
| Cluster tendency         | 0.93        | 67.65              | 21.48               | 0.99           | 27.04              | 6.26                |
| Contrast                 | 0.91        | 46.18              | 20.63               | 0.97           | 23.79              | 5.34                |
| Correlation              | 0.82        | 160.13             | 34.11               | 0.89           | 22.39              | 16.08               |
| Difference entropy       | 0.89        | 11.46              | 14.76               | 0.98           | 8.60               | 10.31               |
| Dissimilarity            | 0.91        | 22.39              | 18.69               | 0.95           | 15.67              | 7.76                |
| Energy                   | 0.89        | 110.90             | 30.02               | 0.97           | 147.25             | 40.03               |
| Entropy                  | 0.90        | 21.35              | 20.65               | 0.98           | 8.95               | 9.71                |
| Homogeneity 1            | 0.88        | 12.55              | 19.25               | 0.94           | 11.64              | 13.19               |
| Homogeneity 2            | 0.88        | 17.90              | 18.63               | 0.93           | 17.33              | 13.95               |
| IMC1                     | 0.82        | -51.02             | 36.42               | 0.97           | -28.61             | 18.63               |
| IMC2                     | 0.90        | 13.83              | 27.91               | 0.95           | 7.88               | 21.36               |
| IDMN                     | 0.64        | 3.57               | 39.51               | 0.94           | 1.20               | 15.73               |
| IDN                      | 0.58        | 3.87               | 30.64               | 0.92           | 2.26               | 18.52               |
| Inverse variance         | 0.88        | 19.74              | 25.69               | 0.95           | 13.52              | 11.72               |
| Max. prob.               | 0.91        | 60.94              | 23.42               | 0.96           | 87.14              | 30.49               |
| Sum average              | 0.90        | 19.33              | 13.07               | 0.95           | 18.39              | 12.37               |
| Sum entropy              | 0.93        | 15.24              | 18.67               | 0.98           | 8.17               | 11.69               |
| Sum variance             | 0.90        | 46.89              | 12.77               | 0.96           | 33.81              | 10.04               |
| Variance                 | 0.92        | 37.16              | 11.90               | 0.96           | 29.42              | 10.17               |
| Gray level run length    |             |                    |                     |                |                    |                     |
| GLN                      | 0.79        | 34.51              | 4.32                | 0.97           | 54.19              | 13.08               |
| HGLRE                    | 0.91        | 41.17              | 13.25               | 0.96           | 30.01              | 9.69                |
| LGLRE                    | 0.57        | 70.48              | 38.36               | 0.80           | 98.37              | 36.08               |
| LRE                      | 0.84        | 15.57              | 19.60               | 0.90           | 11.19              | 13.75               |
| LRHGLE                   | 0.91        | 36.64              | 12.31               | 0.95           | 29.68              | 9.64                |
| LRLGLE                   | 0.66        | 35.16              | 28.40               | 0.89           | 40.15              | 27.81               |
| RLN                      | 0.85        | 36.90              | 5.94                | 0.98           | 41.07              | 9.05                |
| RP                       | 0.81        | 3.53               | 16.43               | 0.90           | 3.42               | 14.93               |
| SRE                      | 0.85        | 2.76               | 17.31               | 0.91           | 2.55               | 15.06               |
| SRHGLE                   | 0.88        | 21.58              | 14.79               | 0.95           | 19.63              | 12.82               |
| SRLGLE                   | 0.55        | 69.61              | 40.28               | 0.81           | 97.44              | 38.64               |
| Gray level size zone     |             |                    |                     |                |                    |                     |
| HIE                      | 0.82        | 64.68              | 28.69               | 0.97           | 36.77              | 11.71               |
| HILAE                    | 0.74        | 349.20             | 20.50               | 0.93           | 227.47             | 16.51               |
| HISAE                    | 0.54        | 89.82              | 44.75               | 0.96           | 26.45              | 10.10               |
| IV                       | 0.64        | 81.39              | 13.46               | 0.17           | 156.41             | 76.36               |
| LAE                      | 0.79        | 465.37             | 27.62               | 0.85           | 257.20             | 14.68               |
| LIE                      | 0.56        | 55.69              | 37.28               | 0.50           | 123.87             | 51.25               |
| LILAE                    | 0.72        | 106.64             | 27.79               | 0.75           | 104.07             | 12.38               |
| LISAE                    | 0.54        | 107.07             | 54.56               | 0.19           | 192.86             | 57.96               |
| SAE                      | 0.35*       | 84.19              | 53.59               | 0.77           | 44.46              | 30.16               |
| SZV                      | 0.81        | 83.06              | 31.33               | 0.81           | 55.47              | 14.88               |
| ZP                       | 0.84        | 74.53              | 34.66               | 0.85           | 67.29              | 23.63               |

IMC1, informational measure of correlation 1; IMC2, informational measure of correlation 2; IDMN, inverse difference moment normalized; IDN, inverse difference normalized; Max. prob., maximum probability; GLN, gray-level non-uniformity; HGLRE, high gray-level run emphasis; HIE, high intensity emphasis; HILAE, high intensity large area emphasis; HISAE, high intensity small area emphasis; IV, intensity variability; LAE, large area emphasis; LGLRE, low gray-level run emphasis; LIE, low intensity emphasis; LILAE, low intensity large area emphasis; LISAE, low intensity small area emphasis; LRE, long run emphasis; LRHGLE, long run high gray-level emphasis; LRLGLE, long run low gray-level emphasis; RLN, run length non-uniformity; RP, run percentage; SRE, short run emphasis; SRHGLE, short run high gray-level emphasis; SRLGLE, short run low gray-level emphasis; SAE, small area emphasis; SZV, size zone variability; ZP, Zone Percentage.

**Supplementary Appendix C. References**

- [1] Wahl RL, Jacene H, Kasamon Y, Lodge MA. From RECIST to PERCIST: Evolving considerations for PET response criteria in solid tumors. *J Nucl Med* 2009;50:122S–50S.
- [2] Haralick RM, Shanmugam K, Dinstein I. Textural features of image classification. *IEEE T Syst Man Cyb* 1973; SMC-3:610–21.
- [3] Galloway M. Texture analysis using gray level run lengths. *Comput Vision Graph* 1975;4:172–9.
- [4] Tixier F, Hatt M, Le Rest CC, Le Pogam A, Corcos L, Visvikis D. Reproducibility of tumor uptake heterogeneity characterization through textural feature analysis in 18F-FDG PET. *J Nucl Med* 2012;53:693–700.
